# Supplementary material for: QALY losses for chronic diseases and its social distribution in the general population: results from the Belgian Health Interview Survey
Source: Research Square preprint supplement (doi:10.21203/rs.3.rs-1110284/v1), 2022-03-11
Supplement: Supplementary file 1 [file c9944fee6829c5dade4049d6.docx]

| **Appendix 1.** Mapping of the chronic diseases according to the MM-21 and ICD-10. | | |
| --- | --- | --- |
| **BHIS 2018** (38 chronic diseases) |  | **MM-21/ICD-10** (23 chronic diseases) |
|  | | |
| Allergy |  | Allergy (T78.4, J30.1) |
|  |
|  |  |  |
| Hip fracture |  | Hip fracture (S70-S79) |
|  |
|  | | |
| Cancer |  | Cancer (C00-D49) |
|  |
|  | | |
| Chronic fatigue |  | Chronic fatigue (R53) |
|  |
|  | | |
| Chronic skin disease |  | Chronic skin disease (L80-L9) |
|  |
|  | | |
| Cirrhosis of the liver/liver dysfunction |  | Cirrhosis of the liver (K70-K77) |
|  |
|  | | |
| Disorder of the larger or the small bowel |  | Bowel disorder (K50-K52, K57, K58) |
|  |
|  | | |
| Gallstones of inflammation of the gallbladder |  | Gallstones (K80-K87) |
|  |
|  | | |
| Osteoporosis |  | Osteoporosis (M81) |
|  |
|  | | |
| Serious disease of the kidney |  | Kidney disease (N18, N19) |
|  |
|  | | |
| Serious gloom or depression |  | Depression (F33, F40, F41) |
|  |
|  | | |
| Stomach ulcer |  | Stomach disorder (K21, K25.7, K29.5) |
|  |
|  | | |
| Stroke (or consequences) |  | Stroke (G45, I60-I69) |
|  |
|  | | |
| Thyroid problems |  | Thyroid problems (E00-E07) |
|  |
|  | | |
| Hypertension  High cholesterol level in blood |  | Hypertension/high cholesterol (I10-I15, E78) |
|  |
|  |  |  |
| Low back disorder  Neck disorder |  | Dorsopathies (M40-M54, M60-M63, M65-M68, M70-M79) |
|  |
|  | | |
| Rheumatoid arthritis  Osteoarthritis/arthrosis |  | Arthropathies (M05.9, M13.0, M13.9, M15-M19) |
|  |
|  | | |
| Asthma  Chronic bronchitis/COPD/emphysema |  | Respiratory disease (J40-J47) |
|  |
|  | | |
| Diabetes  Diabetic retinopathy |  | Diabetes (E10-E14) |
|  |
|  | | |
| Epilepsy  Parkinson’s disease  Severe headache (e.g. migraine) |  | Neurological disorder (G40, G20,G43) |
|  |
|  | | |
| Macular degeneration  Glaucoma  Cataract |  | Eye disease (H35, H40-H42, H25, H26, H28) |
|  |
|  | | |
| Myocardial infarction  Narrowing of blood vessels in belly or legs  Serious heart disease  Coronary heart disease |  | Cardiovascular disease (I20-I25, I48, I70-I79) |
|  |
|  | | |
| Urinary incontinence  Stones in the kidney  Chronic cystitis  Prostate problems |  | Genitourinary problems (N03, N11, N18, N20-N23, N25-N29, N30-N39, N40-N51) |
|  |

| **Appendix 2.** Annual quality-adjusted life-year (QALY) loss per 100,000 individuals associated with 23 chronic diseases, 2013 and 2018. | | | | | | | |
| --- | --- | --- | --- | --- | --- | --- | --- |
| **2013** | **QALY loss** | **Disutility** | **Prevalence** | **2018** | **QALY loss** | **Disutility** | **Prevalence** |
| Dorsopathies | 4,305 | -0.173 | 0.249 | Dorsopathies | 5,033 | -0.167 | 0.301 |
| Arthropathies | 3,414 | -0.175 | 0.195 | Arthropathies | 3,674 | -0.173 | 0.212 |
| Hypertension/high cholesterol | 3,320 | -0.127 | 0.261 | Hypertension/high cholesterol | 3,612 | -0.130 | 0.277 |
| Genitourinary problems | 2,630 | -0.189 | 0.139 | Genitourinary problems | 3,418 | -0.210 | 0.163 |
| Neurological disorder | 2,035 | -0.196 | 0.104 | Allergy | 2,528 | -0.135 | 0.187 |
| Depression | 1,912 | -0.285 | 0.067 | Depression | 2,316 | -0.313 | 0.074 |
| Allergy | 1,725 | -0.122 | 0.142 | Chronic fatigue | 2,278 | -0.278 | 0.082 |
| Chronic fatigue | 1,513 | -0.303 | 0.050 | Neurological disorder | 2,058 | -0.181 | 0.114 |
| Respiratory disease | 1,262 | -0.178 | 0.071 | Respiratory disease | 1,643 | -0.191 | 0.086 |
| Cardiovascular disease | 1,131 | -0.199 | 0.057 | Cardiovascular disease | 1,186 | -0.198 | 0.060 |
| Diabetes | 906 | -0.156 | 0.058 | Bowel disorder | 1,044 | -0.227 | 0.046 |
| Thyroid problems | 798 | -0.138 | 0.058 | Diabetes | 1,028 | -0.166 | 0.062 |
| Osteoporosis | 759 | -0.185 | 0.041 | Thyroid problems | 992 | -0.142 | 0.070 |
| Bowel disorder | 713 | -0.255 | 0.028 | Stomach ulcer | 815 | -0.227 | 0.036 |
| Stomach ulcer | 607 | -0.225 | 0.027 | Chronic skin disease | 674 | -0.173 | 0.039 |
| Eye disease | 531 | -0.136 | 0.039 | Eye disease | 649 | -0.147 | 0.044 |
| Chronic skin disease | 472 | -0.169 | 0.028 | Osteoporosis | 606 | -0.184 | 0.033 |
| Cancer | 403 | -0.212 | 0.019 | Cancer | 505 | -0.211 | 0.024 |
| Kidney disease | 219 | -0.219 | 0.010 | Stroke | 227 | -0.324 | 0.007 |
| Stroke | 196 | -0.196 | 0.010 | Liver disease | 195 | -0.195 | 0.010 |
| Liver disease | 166 | -0.277 | 0.006 | Gallbladder disorder | 165 | -0.150 | 0.011 |
| Hip fracture | 165 | -0.275 | 0.006 | Kidney disease | 164 | -0.164 | 0.010 |
| Gallbladder disorder | 148 | -0.211 | 0.007 | Hip fracture | 93 | -0.185 | 0.005 |
